# Supplementary material for: Tunable electron and hole injection channels at plasmonic Al–TiO2 interfaces
Source: Royal Society of Chemistry journal article supplement (doi:10.1039/d1nr03697a), 2021-01-01
Supplement: d1nr03697a1.pdf [file d1nr03697a1.pdf]

## Supplementary Information

Jie Ma,<sup>\*,†</sup> Xindan Zhang,<sup>†</sup> and Shiwu Gao<sup>\*,‡</sup>

<sup>†</sup>*Key Lab of Advanced Optoelectronic Quantum Architecture and Measurement (MOE),  
School of Physics and Advanced Research Institute of Multidisciplinary Science, Beijing  
Institute of Technology, Beijing 100081, China.*

<sup>‡</sup>*Beijing Computational Science Research Center, Beijing, 100094, China.*

E-mail: majie@bit.edu.cn; swgao@csrc.ac.cn

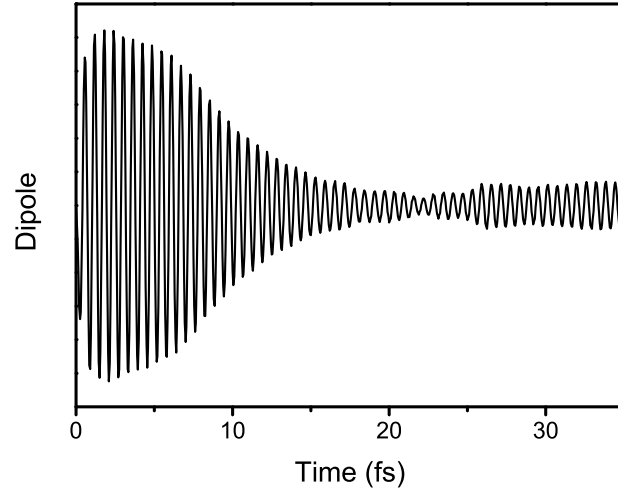

Figure S1: The dipole oscillation of the  $\text{Al}_{19}\text{-TiO}_2$  system under the illumination of a 6.75 eV laser pulse. It decays within 15 fs, indicating the damping of the plasmon.

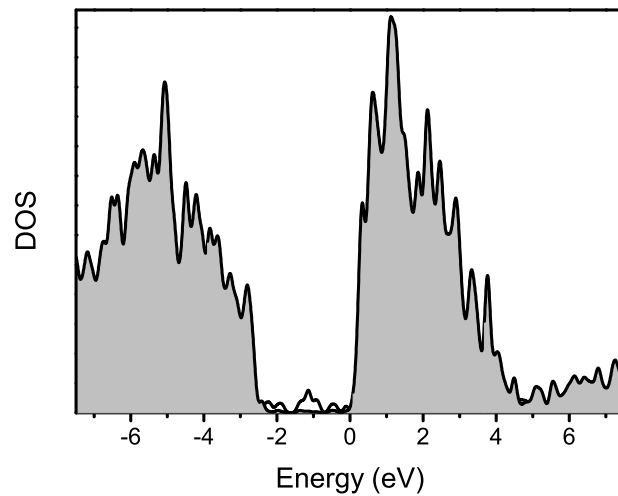

Figure S2: The density of states of the Al<sub>19</sub>-TiO<sub>2</sub> system. The Fermi level is at 0 eV. The grey regions represent the TiO<sub>2</sub> valence bands and conduction bands. The mid gap states are derived from the Al<sub>19</sub> nanocluster.

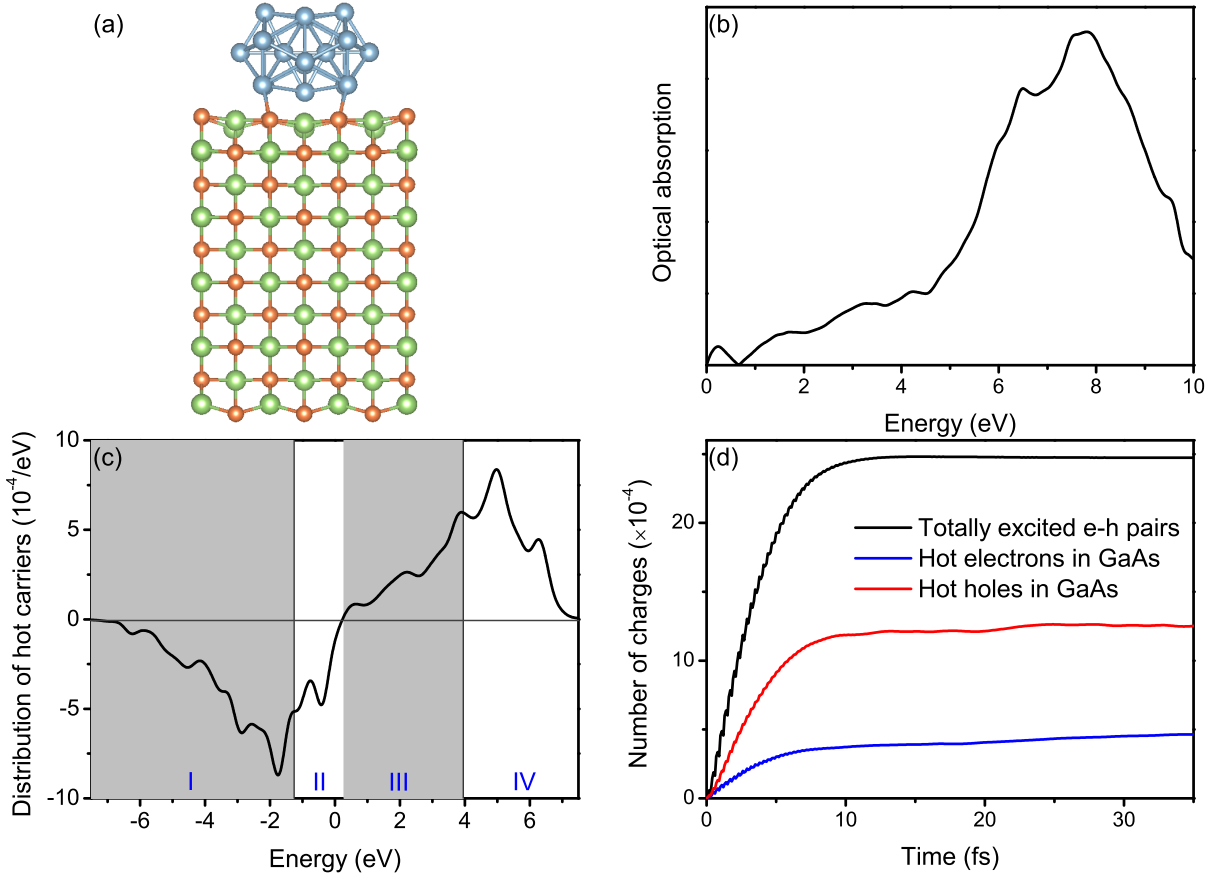

Figure S3: The optimized structure (a), the optical absorption spectrum (b), the hot carrier distribution at 30 fs (c), and the numbers of totally excited electron-hole pairs, hot holes and hot electrons in the GaAs (d) for the Al<sub>19</sub>-GaAs system. The excitation frequency is 6.75 eV. In the calculations, the electronic structure of GaAs has been corrected to reproduce the experimental band gap and electron affinity.

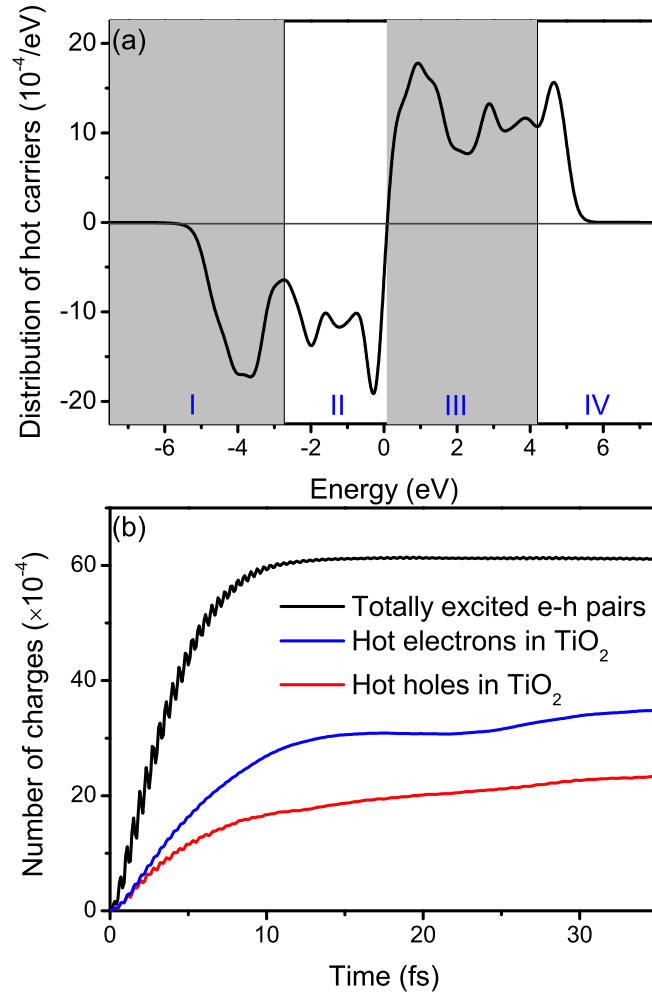

Figure S4: The hot carrier distribution at 30 fs (a) and the numbers of totally excited electron-hole pairs, hot holes and hot electrons in the  $\text{TiO}_2$  (b) for the  $\text{Al}_{32}\text{-TiO}_2$  system. The excitation frequency is 4.95 eV.

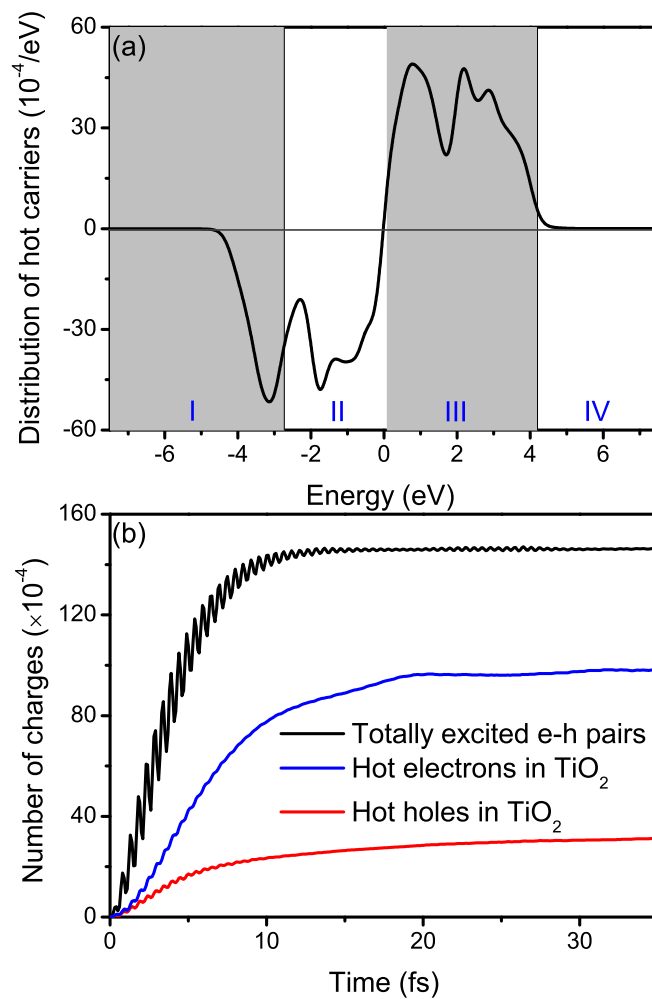

Figure S5: The hot carrier distribution at 30 fs (a) and the numbers of totally excited electron-hole pairs, hot holes and hot electrons in the  $\text{TiO}_2$  (b) for the  $\text{Al}_{50}\text{-TiO}_2$  system. The excitation frequency is 4 eV.

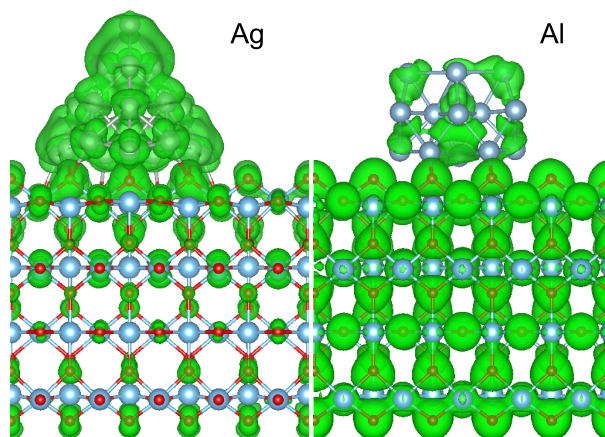

Figure S6: The charge densities of the region I hot carriers for the Ag-TiO<sub>2</sub> (left panel) and Al-TiO<sub>2</sub> (right panel) systems. The charge density is more localized on the Ag nanocluster than on the Al nanocluster, due to the *d*-band character in Ag.
